# Supplementary material
Source: Research Square preprint supplement (doi:10.21203/rs.3.rs-9520764/v1)
Supplement: Supplementary file 1 [file 37fca114e8ae3833523052ff.docx]

**Appendix A. Supplementary material**

**Title: A spatial simulation framework for afforestation policy assessment in Chile: accounting for uncertainty in projected land-use change and hydrological risk**

Jorge Herrera-Benavides a,b,e; Mauricio Galleguillos b,c,d,e; Raúl O’Ryan a,e

a: Faculty of Engineering and Sciences, Universidad Adolfo Ibáñez; Avenida Diagonal las Torres 2640, Peñalolén Santiago de Chile

b: Data Observatory Foundation, Eliodoro Yáñez 2990, Oficina 5B, Piso 3, Providencia, Chile.

c: Departamento de Ingeniería Hidráulica y Ambiental, Pontificia Universidad Católica de Chile, Av. Vicuña Mackenna 4860, Macul, Santiago de Chile

d: Facultad de Agronomía y Sistemas Naturales, Pontificia Universidad Católica de Chile, Av. Vicuña Mackenna 4860, Macul, Santiago, Chile

e: Center for Climate and Resilience Research - CR2, Blanco Encalada 2002, piso 4. Santiago, Chile Facultad Ciencias Físicas y Matemáticas, Universidad de Chile.

**Corresponding author**

Jorge Herrera-Benavides; [jorgeaherrera@alumnos.uai.cl](mailto:jorgeaherrera@alumnos.uai.cl);

Avenida Diagonal las Torres 2640, Peñalolén Santiago de Chile.

**Appendix A. Supplementary material**

**A1. Land-cover data, reclassification, and spatial resolution**

We used Dynamic Land Cover for 2013-2018 as the baseline land-cover reference to simulate future land uses and to estimate land-use occurrence probabilities (Galleguillos et al., 2024). The period 2013-2018 was selected because it corresponds to a phase of relative legal stability in environmental and land-use policy. Dynamic Land Cover for 1990-2018 was additionally used to derive land-use change history predictors, specifically the frequency with which each pixel was classified as native forest or plantation during the historical period (Galleguillos et al., 2024). Land cover was reclassified into the study’s land-use classes (aligned with the classification used by CONAF) and resampled to a 1-ha spatial resolution, consistent with the scale at which national public and legal land management is commonly implemented.

Reclassification was done pixel by pixel using a predefined rule table, which ensured consistency across all raster layers. This procedure allowed for the aggregation of ecologically and functionally similar land cover types (e.g., different categories of native forests or types of plantations) into unified classes relevant for forest analysis and land use change modeling. Subsequently, all rasters were resampled to a spatial resolution of 1 hectare, which corresponds to the standard scale at which land use regulation, forest management, and public environmental planning are implemented in Chile.

**Appendix Table A1. Reclassification description of CLDynamic Land Cover (Galleguillos et al., 2024)**

| **Original ID** | **Original class description** | **Reclassified class** | **Reclassified category** |
| --- | --- | --- | --- |
| **1** | Natural and artificial inland water bodies, including lakes, lagoons, rivers, streams, and agricultural or mining reservoirs. | **1** | Water bodies |
| **2** | Coastal and riverine beaches and dunes, inland dunes, sandbanks, and sandy sectors at altitude. | **2** | Bare or non-vegetated areas |
| **3** | Mediterranean sclerophyll native forest with mature trees or dense woody vegetation (>2 m) and >80% canopy cover. | **3** | Native forest |
| **4** | Temperate native forest with mature trees (>3 m) and >90% canopy cover. | **3** | Native forest |
| **5** | Exotic broadleaf forest plantations, Eucalyptus spp. | **4** | Forest plantations |
| **6** | Fruit tree plantations derived from fruit cadastre training points (vineyards, avocado, citrus, etc.). | **5** | Fruit crops |
| **7** | Permanent snow-covered surfaces and eternal ice. | **2** | Bare or non-vegetated areas |
| **8** | Permanently or seasonally flooded vegetated areas adjacent to watercourses and water bodies. | **6** | Wetlands |
| **9** | Woody shrub and bush vegetation (<3 m height) with 5-80% canopy cover. | **7** | Shrublands (native vegetation) |
| **10** | Exotic conifer plantations, mainly *Pinus radiata*. | **4** | Forest plantations |
| **11** | Natural grasslands, pastures, and annual irrigated or rainfed agricultural crops with high seasonal variability. | **8** | Grasslands and crops |
| **12** | Managed and unmanaged evergreen grasslands and pastures, common in southern Chile, with low seasonal variability. | **9** | Grasslands |
| **13** | Exposed soils, excavations, landfills, roads, mine stockpiles, rocky outcrops, landslides, and areas above vegetation limits. | **2** | Bare or non-vegetated areas |
| **14** | Soil covered by peatlands. | **6** | Wetlands |
| **15** | Impervious anthropogenic surfaces such as buildings, paved roads, housing, and industrial areas. | **10** | Urban areas |
| **16** | Estimated harvested areas of forest plantations. | **4** | Forest plantations |

**A2. GeoSOS-FLUS allocation mechanism and stochastic selection**

GeoSOS-FLUS allocates land-use transitions through a bottom-up cellular automata (CA) competition process, driven by suitability, neighborhood effects, inertia, and conversion costs (Liu et al., 2017). Allocation incorporates stochasticity wheels roulette selection, where the next land-use class for pixel is selected based on the cumulative transition probability exceeding a random draw :

**Equation A2. Roulette selection mechanism.** denotes the future land-use class of pixel ; is the combined transition probability for class ; is the number of classes; and is a uniformly distributed random variable.

The combined transition probability used to construct the roulette wheel is:

**Equation A2. Combined transition probability.** is the probability of occurrence (suitability) for class ; is the neighborhood effect; is the inertia coefficient; and is the conversion cost from current class to target class .

**A3. Probability of occurrence and predictor variables**

To estimate the probability of occurrence (suitability) of each land-use class at each pixel, we implemented the FT-Transformer architecture (Gorishniy et al., 2023), an adaptation of Transformer models for tabular data (Vaswani et al., 2017). The model was implemented in Python using the PyTorch Tabular library (Joseph, 2021), following Gorishniy et al. (2023). A random training sample of 150,000 observations per class was obtained, and geospatial predictors were extracted for each sample (Appendix Table A3). The outputs is a probability vector over classes for each pixel:

**Equation A3. Probability of occurrence.** denotes the probability of occurrence (suitability) of class in pixel .

**Appendix Table A3. Predictor variables used to estimate probability of occurrence**

| **Variable** | **Description** | **Source** |
| --- | --- | --- |
| Aridity Index | Index relating precipitation to potential evapotranspiration, indicating degree of aridity | Aridity index Chile (Zomer et al., 2022) |
| Elevation | Terrain elevation from the digital elevation model | SRTM DEM (2000) |
| Exposure (north-south, east-west) | Cardinal orientation of slopes (aspect) derived from the digital elevation model | SRTM DEM (2000) |
| Slope | Terrain inclination from the digital elevation model | SRTM DEM (2000) |
| Distance to hydrographic network | Euclidean distance to rivers, streams, and canals | Hydrographic network drainage polylines (BCN, 2019) |
| Distance to road network | Euclidean distance to the national road network | Road network polylines (BCN, 2019) |
| Distance to water bodies | Distance to lakes, lagoons, glaciers, reservoirs, and other surface water bodies | Water bodies polygons (BCN, 2020) |
| Distance to SNASPE | Distance to boundaries of protected areas | National System of State Protected Wildlife Areas (2024) |
| Distance to urban areas | Distance to urban areas and settlements defined by official cartography | Urban areas (BCN, 2019) |
| Average NDVI in 2018 | Annual average NDVI | Landsat 8 (Jan 1-Dec 31, 2018) |
| Parcel subdivisions up to 2018 | Record of land parcel subdivisions up to 2018 | SII and CIREN (Herrera-Benavides et al., 2024) |
| NDVI range Landsat 5-8 | Range of interannual NDVI variation over historical period | Landsat 5 & 8 (1984-2018) |
| Forest plantation frequency | Frequency classified as plantation during historical period | CLDynamicLandCover 1999-2018 (Galleguillos et al., 2024) |
| Native forest frequency | Frequency classified as native forest during historical period | CLDynamicLandCover 1999-2018 (Galleguillos et al., 2024) |

**A4. Scenario demand specification and interpretation of “afforestation”**

GeoSOS-FLUS includes a Markov-chain module to project future land-use demand; however, this demand module was not used in this study. Instead, we prescribed the 2030 demand to test feasibility of Chile’s commitment under biophysical/legal constraints and land-use competition. Specifically, native forest demand in 2030 was set to the 2018 native-forest area plus 200,000 ha, and other land uses were reduced proportionally to their baseline shares. This prescribed demand setting was held constant across scenarios.

In the manuscript, transitions to native forest are interpreted as “afforestation” under the NC strategy; however, some transitions may represent natural recovery or regeneration of degraded forests. GeoSOS-FLUS simulates land-cover transitions rather than ecological processes and therefore does not distinguish active planting from passive recovery.

**A5. Incentive predictor construction (incentive scenario)**

In the incentive scenario, a predictor representing incentive value was added to the FT-Transformer model so that suitability reflects policy preference for higher-sequestration forest types. To construct this predictor, we first selected areas from Dynamic LandCover (Galleguillos et al., 2024) with a strong historical native forest signal (e.g., >80% native forest frequency), based on the premise that conversion is more straightforward in these locations. Next, potential forest types were identified by intersecting candidate areas with vegetation belts from Luebert & Pliscoff (2017) (detailed in Table A5.). Incentive values were then assigned proportional to the carbon sequestration rate associated with each forest type, using the sequestration rates employed in Chile’s official greenhouse gas inventory (Ministry of the Environment, 2024). In practice, sequestration rates were normalized and discretized into a small number of incentive levels (see Equation A5 and Table A5.1).

**Appendix Table A5**: Reclassification of vegetation soils

| **Vegetation belt** | **CONAF forest type** |
| --- | --- |
| Mediterranean deciduous Andean Forest of *Nothofagus glauca* - *N. obliqua* | Roble-Hualo |
| Mediterranean deciduous coastal forest of *Nothofagus glauca* - *Azara petiolaris* | Roble-Hualo |
| Mediterranean deciduous coastal forest of *Nothofagus glauca* - *Persea lingue* | Roble-Hualo |
| Mediterranean deciduous coastal forest of *Nothofagus macrocarpa* / *Ribes punctatum* | Other / Mixed |
| Mediterranean deciduous coastal forest of *Nothofagus obliqua* - *Gomortega keule* | Roble-Hualo |
| Mediterranean deciduous forest of *Nothofagus obliqua* - *Persea lingue* | Roble-Hualo |
| Mediterranean deciduous interior forest of *Nothofagus obliqua* - *Cryptocarya alba* | Roble-Hualo |
| Mediterranean-temperate deciduous Andean Forest of *Nothofagus alpina* - *N. obliqua* | Roble-Raulí-Coihue |
| Mediterranean-temperate deciduous Andean Forest of *Nothofagus obliqua* - *Austrocedrus chilensis* | Roble-Hualo |
| Mediterranean-temperate deciduous Andean Forest of *Nothofagus pumilio* - *N. obliqua* | Lenga |
| Temperate deciduous Andean Forest of *Nothofagus alpina* - *Dasyphyllum diacanthoides* | Roble-Raulí-Coihue |
| Temperate deciduous Andean Forest of *Nothofagus alpina* - *N. dombeyi* | Roble-Raulí-Coihue |
| Temperate deciduous Andean Forest of *Nothofagus pumilio* - *Araucaria araucana* | Lenga |
| Temperate deciduous Andean Forest of *Nothofagus pumilio* / *Azara alpina* | Lenga |
| Temperate deciduous Andean Forest of *Nothofagus pumilio* / *Berberis ilicifolia* | Lenga |
| Temperate deciduous Andean Forest of *Nothofagus pumilio* / *Drimys andina* | Lenga |
| Temperate deciduous Andean Forest of *Nothofagus pumilio* / *Ribes cucullatum* | Lenga |
| Temperate deciduous coastal forest of *Nothofagus alpina* - *Persea lingue* | Roble-Raulí-Coihue |
| Temperate deciduous forest of *Nothofagus obliqua* - *Laurelia sempervirens* | Roble-Hualo |
| Mediterranean sclerophyll Andean Forest of *Kageneckia angustifolia* / *Guindilia trinervis* | Sclerophyllous |
| Mediterranean sclerophyll Andean Forest of *Lithrea caustica* - *Lomatia hirsuta* | Sclerophyllous |
| Mediterranean sclerophyll Andean Forest of *Quillaja saponaria* - *Lithrea caustica* | Sclerophyllous |
| Mediterranean sclerophyll coastal forest of *Cryptocarya alba* - *Peumus boldus* | Sclerophyllous |
| Mediterranean sclerophyll coastal forest of *Lithrea caustica* - *Azara integrifolia* | Sclerophyllous |
| Mediterranean sclerophyll interior forest of *Lithrea caustica* - *Peumus boldus* | Sclerophyllous |
| Temperate laurifolious coastal forest of *Aextoxicon punctatum* - *Laurelia sempervirens* | Evergreen |
| Temperate laurifolious coastal forest of *Weinmannia trichosperma* - *Laureliopsis philippiana* | Evergreen |
| Temperate laurifolious interior forest of *Nothofagus dombeyi* - *Eucryphia cordifolia* | Roble-Raulí-Coihue |
| Mediterranean-temperate mixed coastal forest of *Nothofagus dombeyi* - *N. obliqua* | Roble-Raulí-Coihue |
| Mediterranean-temperate resinous Andean Forest of *Araucaria araucana* / *Festuca scabriuscula* | Araucaria |
| Temperate resinous Andean Forest of *Araucaria araucana* - *Nothofagus dombeyi* | Roble-Raulí-Coihue |
| Temperate resinous Andean Forest of *Fitzroya cupressoides* | Alerce |
| Temperate resinous coastal forest of *Araucaria araucana* | Araucaria |
| Temperate resinous coastal forest of *Fitzroya cupressoides* | Alerce |
| Temperate resinous coastal forest of *Pilgerodendron uvifera* - *Tepualia stipularis* | Alerce |
| Temperate evergreen Andean forest of *Austrocedrus chilensis* - *Nothofagus dombeyi* | Roble-Raulí-Coihue |
| Temperate evergreen Andean forest of *Nothofagus betuloides* - *Laureliopsis philippiana* | Evergreen |
| Temperate evergreen Andean forest of *Nothofagus betuloides* / *Chusquea macrostachya* | Evergreen |
| Temperate evergreen Andean forest of *Nothofagus dombeyi* - *Saxegothaea conspicua* | Roble-Raulí-Coihue |
| Temperate evergreen Andean forest of *Nothofagus dombeyi* / *Gaultheria phillyreifolia* | Roble-Raulí-Coihue |
| Temperate evergreen interior forest of *Nothofagus betuloides* / *Desfontainia fulgens* | Evergreen |
| Temperate evergreen interior forest of *Nothofagus nitida* - *Podocarpus nubigenus* | Evergreen |

A conceptual weighting scheme was used to translate sequestration rates into incentive weights:

**Equation A5. Incentive weighting scheme (conceptual).** is the average sequestration per forest type, and is the maximum value across forest types (Ministry of the Environment, 2024). In implementation, values were normalized and discretized into incentive levels (Table A5.1).

**Appendix Table A5.1. Assigned incentive values.**

| **Forest type** | **IPA (m³ ha⁻¹ yr⁻¹)** | **Incentive value (using IPA)** |
| --- | --- | --- |
| Palma chilena | 1.4 | 1 |
| Alerce | 0.5 | 1 |
| Ciprés de la Cordillera | 5 | 1.436 |
| Araucaria | 4.6 | 1.195 |
| Roble-Hualo | 7 | 2.639 |
| Ciprés de las Guaitecas | 3.9 | 1 |
| Esclerófilo | 1.4 | 1 |
| Coihue-Raulí-Tepa | 5.5 | 1.737 |
| Coihue de Magallanes | 3.5 | 1 |
| Roble-Raulí-Coihue | 7.6 | 3 |
| Lenga | 4.9 | 1.376 |
| Siempreverde | 6 | 2.038 |

**A6. Hyperparameters, conversion costs, and constraints**

Neighborhood-weight influence hyperparameters were set to 1 for all classes (default values). Conversion costs were assigned primarily in accordance with Chilean legislation (see Supplementary material, Table A6). Because the study’s goal was to simulate an increase in the native forest category, demands for other land uses were held stable under the prescribed-demand setting and their changes were expected to be marginal. The simulation area was limited to the surface identified as potentially suitable for afforestation, consistent with the areas counted for reporting under the afforestation strategy. A value of 1 indicates that conversion is allowed; 0 indicates restricted or forbidden conversion.

**Appendix Table A6: Conversion cost**

| **From \ To** | **1** | **2** | **3** | **4** | **5** | **6** | **7** | **8** | **9** | **10** |
| --- | --- | --- | --- | --- | --- | --- | --- | --- | --- | --- |
| **1 Water bodies** | 1 | 1 | 0 | 0 | 0 | 1 | 0 | 0 | 0 | 0 |
| **2 Bare areas** | 1 | 1 | 0 | 0 | 0 | 1 | 0 | 0 | 0 | 1 |
| **3 Native forest** | 0 | 0 | 1 | 0 | 0 | 0 | 0 | 0 | 0 | 0 |
| **4 Forest plantations** | 0 | 0 | 0 | 1 | 0 | 0 | 0 | 0 | 0 | 0 |
| **5 Fruit crops** | 0 | 1 | 0 | 1 | 1 | 0 | 0 | 0 | 0 | 1 |
| **6 Wetlands** | 1 | 0 | 1 | 0 | 0 | 1 | 1 | 0 | 0 | 0 |
| **7 Shrublands** | 0 | 1 | 1 | 1 | 1 | 0 | 1 | 1 | 1 | 1 |
| **8 Grasslands & crops** | 0 | 1 | 1 | 1 | 1 | 0 | 0 | 1 | 1 | 1 |
| **9 Grasslands** | 0 | 1 | 1 | 1 | 1 | 1 | 0 | 0 | 1 | 1 |
| **10 Urban areas** | 0 | 0 | 0 | 0 | 0 | 0 | 0 | 0 | 0 | 1 |

Other hyperparameters were modified only to ensure model convergence in an optimal time (Table A6.1). A manual test was performed on the neighborhood size hyperparameter, but it only influenced convergence time. T

**Appendix Table A6.1: Global hyperparameters**

| **Parameter** | **Value** |
| --- | --- |
| Maximum number of iterations | 500 |
| Neighborhood size | 5 |
| Accelerated factor | 2 |
| Enclaves for land-use type | 1 |
| Number of threads | 16 |

**A7. Ensemble synthesis, certainty mapping, and spatial analyses**

To address model stochasticity, we generated an ensemble of 100 simulations for each scenario and summarized results as afforestation change frequency maps. We filtered pixels with a change frequency > 0.5 and selected pixel groups with an area > 5 ha, consistent with the minimum patch size used in Chile’s afforestation strategy. Under this interpretation, a pixel frequency of 0.5 indicates that the model classified the pixel as native forest in 50% of simulations. This post-processing supports identification of higher-certainty afforestation patches under stochastic allocation.

Landscape metrics were computed to compare scenarios using the PyLandStats library (Bosch, 2019). In addition, variation in afforestation area across scenarios was calculated by watershed to identify basins experiencing the greatest expansion under each scenario. Watersheds were classified by water scarcity level using the Water Scarcity Index (WSI; Boisier et al., 2024), which quantifies the balance between water availability and demand. WSI was calculated for a reference period (1960s-2010s) and an extreme megadrought-focused period (2010s), and afforestation outcomes were summarized across WSI risk levels.
